# Supplementary material for: Construction of aggregation-induced emission photosensitizers based on supramolecular polymers for enhanced photocatalytic oxidative coupling of amines
Source: Royal Society of Chemistry journal article supplement (doi:10.1039/d3py00927k), 2023-01-01
Supplement: d3py00927k1.pdf [file d3py00927k1.pdf]

Electronic Supplementary Information for

**Construction of aggregation-induced emission photosensitizers based  
on supramolecular polymers for enhanced photocatalytic oxidative  
coupling of amines**

Rong-Zhen Zhang, Chao-Qun Ma, Hui Liu, Rui-Zhi Dong, Kai-Kai Niu, Shengsheng Yu, Yue-Bo Wang,\* Ling-Bao Xing\*

School of Chemistry and Chemical Engineering, Shandong University of Technology,  
Zibo 255000, P. R. China

\*Corresponding author: Tel./fax: +86 533 2781664. E-mail: ybwang@sdut.edu.cn;  
lbxing@sdut.edu.cn.

## List of supplementary results.

**Fig. S1**  $^1\text{H}$  NMR spectra of TPE-DBr in  $\text{CDCl}_3$ .

**Fig. S2**  $^1\text{H}$  NMR spectra of TPE-Epy in  $\text{DMSO-}d_6$ .

**Fig. S3**  $^{13}\text{C}$  NMR spectra of TPE-Epy in  $\text{DMSO-}d_6$ .

**Fig. S4** CIE chromaticity coordinates of TPE-Epy-CB[8] (from 0 to 1:1) ( $[\text{TPE-Epy}] = 2.0 \times 10^{-5} \text{ M}$ ,  $[\text{CB}[8]] = 1.5 \times 10^{-3} \text{ M}$ ).

**Fig. S5** (a)  $^1\text{H}$  NMR spectra of TPE-Epy in  $\text{DMSO-}d_6$ ;  $^1\text{H}$  NMR spectra of (b) TPE-Epy, (c) TPE-Epy-CB[8], and (d) CB[8] in  $\text{D}_2\text{O}$ .

**Fig. S6** The Job's plot of TPE-Epy-CB[8] ( $\lambda_{\text{ex}} = 410 \text{ nm}$ ) with the total concentration of TPE-Epy and CB[8] fixed at  $2.0 \times 10^{-5} \text{ M}$ . Experimental conditions:  $[\text{TPE-Epy}] = 2.0 \times 10^{-5} \text{ M}$ ,  $[\text{CB}[8]] = 1.5 \times 10^{-3} \text{ M}$ .

**Fig. S7** Zeta potentials of (a) TPE-Epy and (b) TPE-Epy-CB[8].

**Fig. S8** (a) UV-vis absorption spectra of ABDA in the absence of PSs under white light irradiation in aqueous solution. The absorption spectra of ABDA ( $1.6 \times 10^{-4} \text{ M}$ ) after irradiation (white light) for different time in the presence of (b) TPE-Epy ( $2.0 \times 10^{-5} \text{ M}$ ) and (c) TPE-Epy-CB[8] ( $2.0 \times 10^{-5} \text{ M}$ ).  $[\text{TPE-Epy}] = 2.0 \times 10^{-5} \text{ M}$ ,  $[\text{CB}[8]] = 1.5 \times 10^{-3} \text{ M}$ .

**Fig. S9** The fluorescence emission spectra of DHE ( $1.6 \times 10^{-4} \text{ M}$ ) after irradiation (white light) for different time in the presence of (a) TPE-Epy ( $2.0 \times 10^{-5} \text{ M}$ ) and (b) TPE-Epy-CB[8] ( $2.0 \times 10^{-5} \text{ M}$ ).  $[\text{TPE-Epy}] = 2.0 \times 10^{-5} \text{ M}$ ,  $[\text{CB}[8]] = 1.5 \times 10^{-3} \text{ M}$ .

**Fig. S10**  $^1\text{H}$  NMR spectra of **2a** in  $\text{CDCl}_3$ .

**Fig. S11** Control experiments of the photooxidation reaction in the presence of different scavengers of  $\text{NaN}_3$ , BQ, KI, and TEA.

## **1. Materials and instruments**

Unless otherwise stated, the chemicals used are all purchased from reagent companies.  $^1\text{H}$  NMR was characterized on Bruker Avance 400 NMR instrument. UV-vis absorption spectra were characterized by a Shimadzu UV-2450 spectrophotometer. Fluorescence emission spectra were obtained by fluorescence spectrophotometer F-380A. DLS and Zeta potential tests were constructed on Malvern Zeta sizer Nano ZS90. Transmission electron microscopy (TEM) images were obtained on a JEM 2100 operating at 120 kV. Samples for TEM measurements were prepared by dropping the mixed aqueous solution on the carbon-coated copper grid (300 mesh) and drying by slow evaporation.

## 2. Synthesis of TPE-Epy

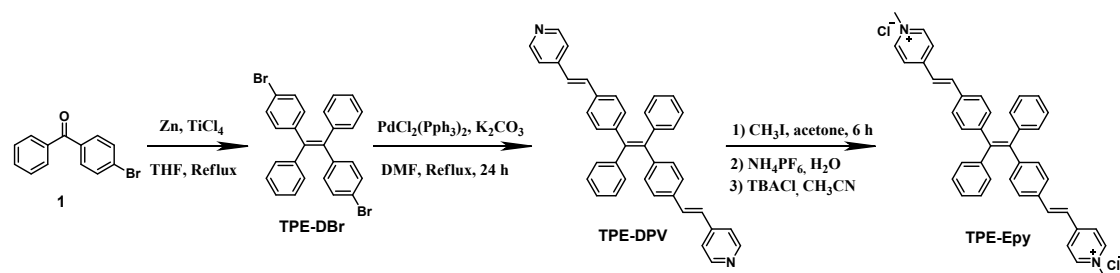

**Scheme S1** The synthetic route of the TPE-Epy.

**Synthesis of compound TPE-DBr:** To a mixture of (4-bromophenyl)(phenyl)methanone (1.30 g, 5 mmol) and Zn (1.95 g, 30.0 mmol) in 100 mL dry THF was added dropwise TiCl<sub>4</sub> (1.65 mL, 15.0 mmol) under N<sub>2</sub> at 0 °C. The mixture was stirred at 0 °C for 30 min and another 2 h at room temperature. Then the reaction mixture was refluxed overnight. After cooling down to room temperature, 10% K<sub>2</sub>CO<sub>3</sub> (aq) was added and the mixture was filtered. The filtrates were extracted with dichloromethane and the extracts were washed with brine. After solvent removal under reduced pressure, the crude product was purified by column chromatography to afford TPE-DBr as white solid (0.93 g, 76 %).

**Synthesis of compound TPE-DPV** Tris-tolyl phosphine (150 mg, 0.57 mmol) and Dichlorobis(triphenyl-phosphine)palladium (50 mg, 0.07 mmol) and were introduced into a dry and degassed triethylamine/N,N-dimethylformamide (15 mL, v/v= 10:5) mixture, which was stirred for 15 min. The mixture was degassed again by gentle bubbling of nitrogen, and TPE-DBr (735 mg, 1.5 mmol) and 4-vinylpyridine (500 μL, 4.8 mmol) were added. The system was stirred at 90 °C under nitrogen for 8 h. The resulting mixture was allowed to cool to room temperature, and triethylamine was removed in vacuo. The crude mixture was diluted with dichloromethane and washed with water and saturated sodium bicarbonate, after concentration, the residue was purified by column chromatography. And then we can get the product TPE-DPV (461mg, 57 %).

### **3. General procedure for photooxidation reactions of benzylamine and its derivatives**

The benzylamine (11  $\mu$ L, 0.1 mmol) was dissolved in freshly prepared (2.0 mL, [TPE-Epy]= $2.5 \times 10^{-4}$  M, [CB[8]]= $2.5 \times 10^{-4}$  M). The mixture was subsequently irradiated with a white light (6000-6500 K) for 24 h at room temperature. Afterward, the organic product was extracted with ethyl acetate, and the mixed organic layer was dried with anhydrous  $\text{Na}_2\text{SO}_4$ , the solvent removed by reduced pressure distillation. The fractions of the resulting oil were analyzed by  $^1\text{H}$  NMR.

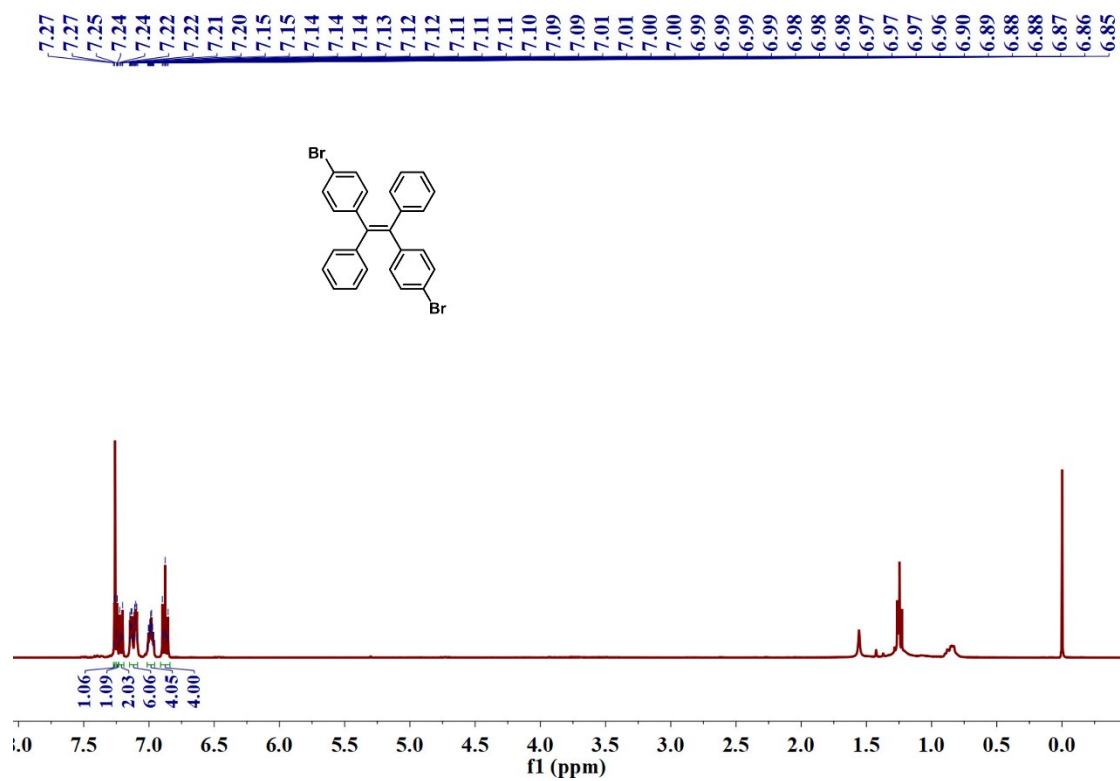

Fig. S1 <sup>1</sup>H NMR spectra of TPE-DBr in CDCl<sub>3</sub>.

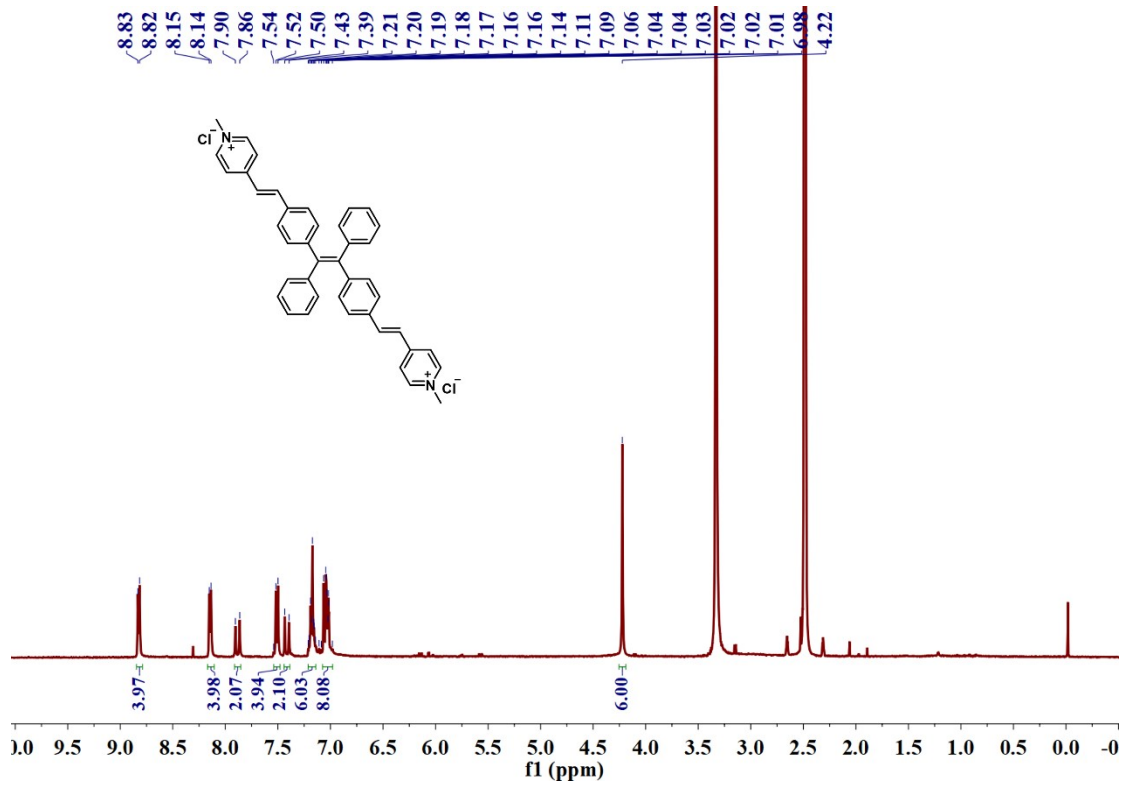

**Fig. S2**  $^1\text{H}$  NMR spectra of TPE-Epy in  $\text{DMSO-}d_6$ .

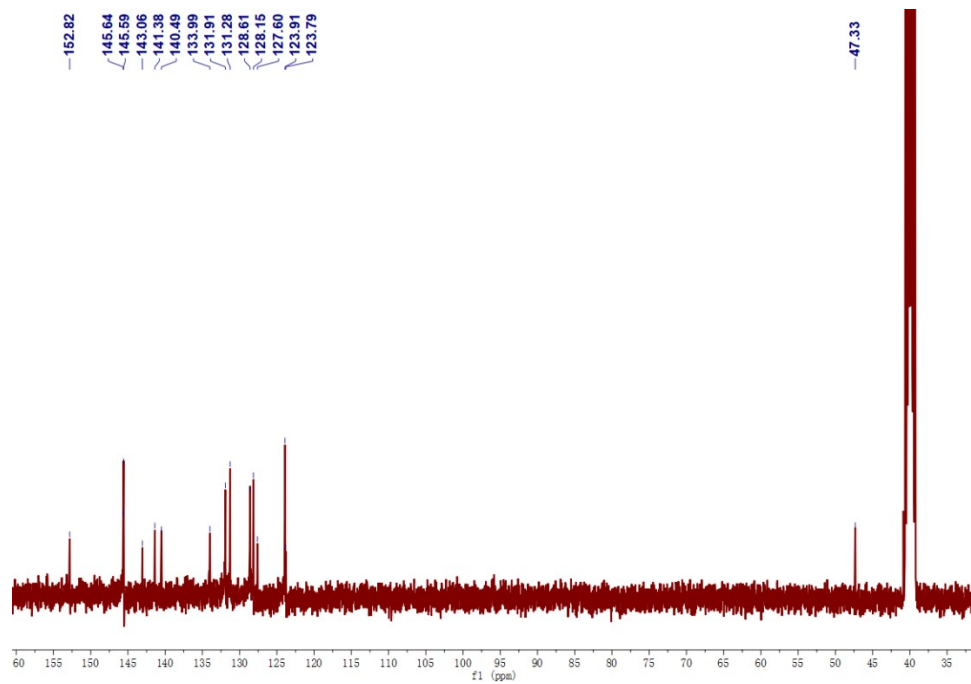

**Fig. S3**  $^{13}\text{C}$  NMR spectra of TPE-Epy in  $\text{DMSO-}d_6$ .



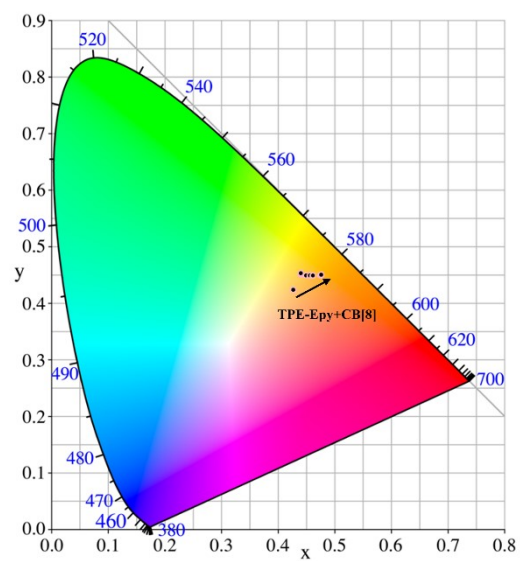

**Fig. S4** CIE chromaticity coordinates of TPE-Epy-CB[8] (from 0 to 1:1) ( $[TPE-Epy] = 2.0 \times 10^{-5} \text{ M}$ ,  $[CB[8]] = 1.5 \times 10^{-3} \text{ M}$ ).

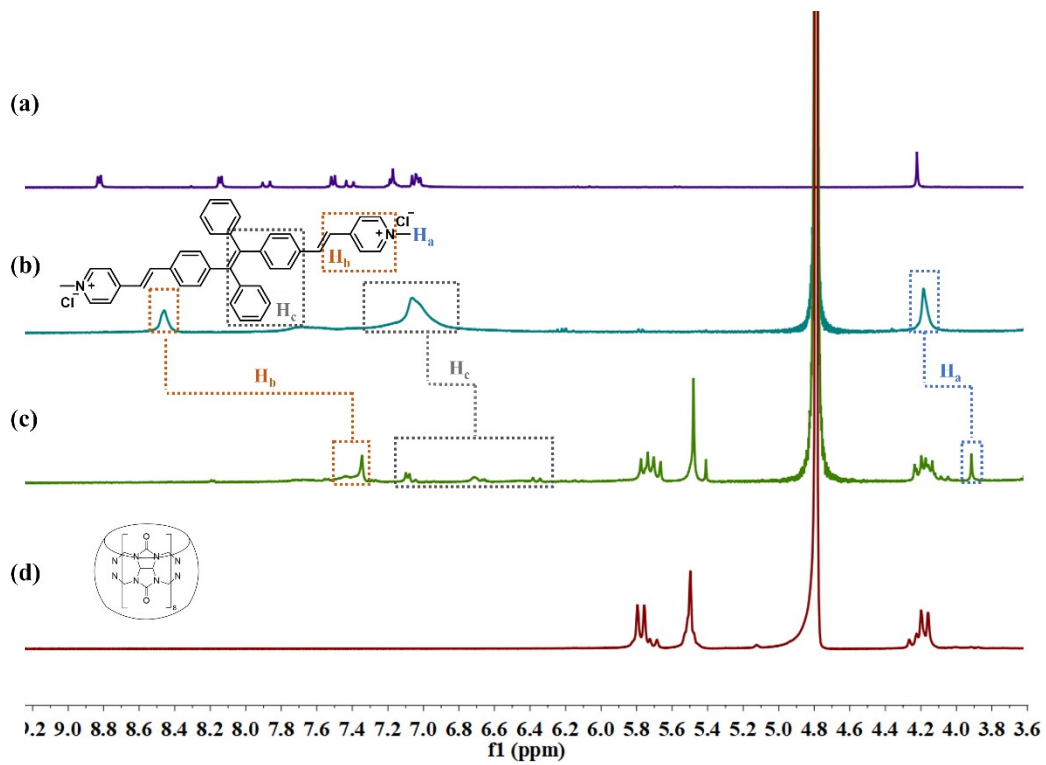

**Fig. S5** (a)  $^1\text{H}$  NMR spectra of TPE-Epy in  $\text{DMSO-}d_6$ ;  $^1\text{H}$  NMR spectra of (b) TPE-Epy, (c) TPE-Epy-CB[8], and (d) CB[8] in  $\text{D}_2\text{O}$ .

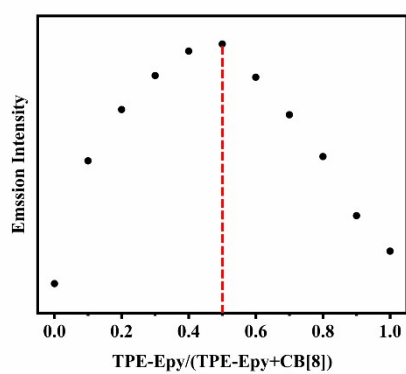

**Fig. S6** The job's plots of TPE-Epy-CB[8] ( $\lambda_{\text{ex}} = 410 \text{ nm}$ ) with the total concentration of TPE-Epy and CB[8] fixed at  $2.0 \times 10^{-5} \text{ M}$ . Experimental conditions:  $[\text{TPE-Epy}] = 2.0 \times 10^{-5} \text{ M}$ ,  $[\text{CB}[8]] = 1.5 \times 10^{-3} \text{ M}$ .

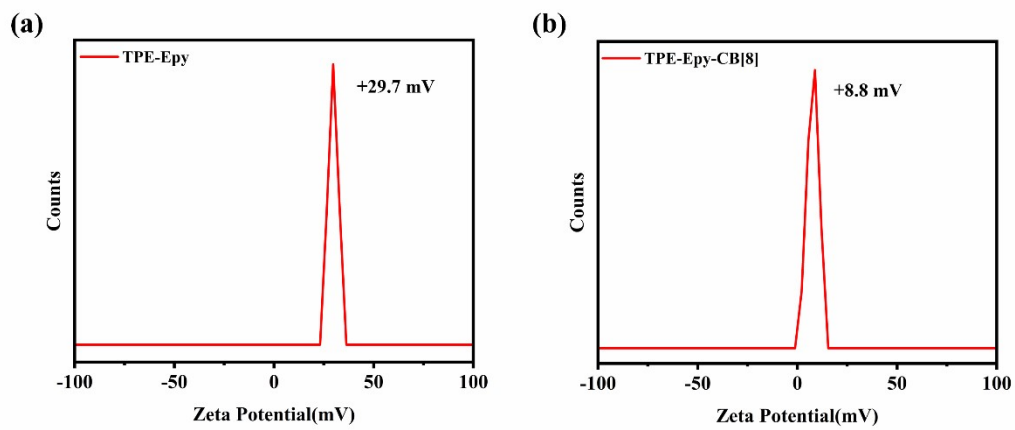

**Fig. S7** Zeta potentials of (a) TPE-Epy and (b) TPE-Epy-CB[8].

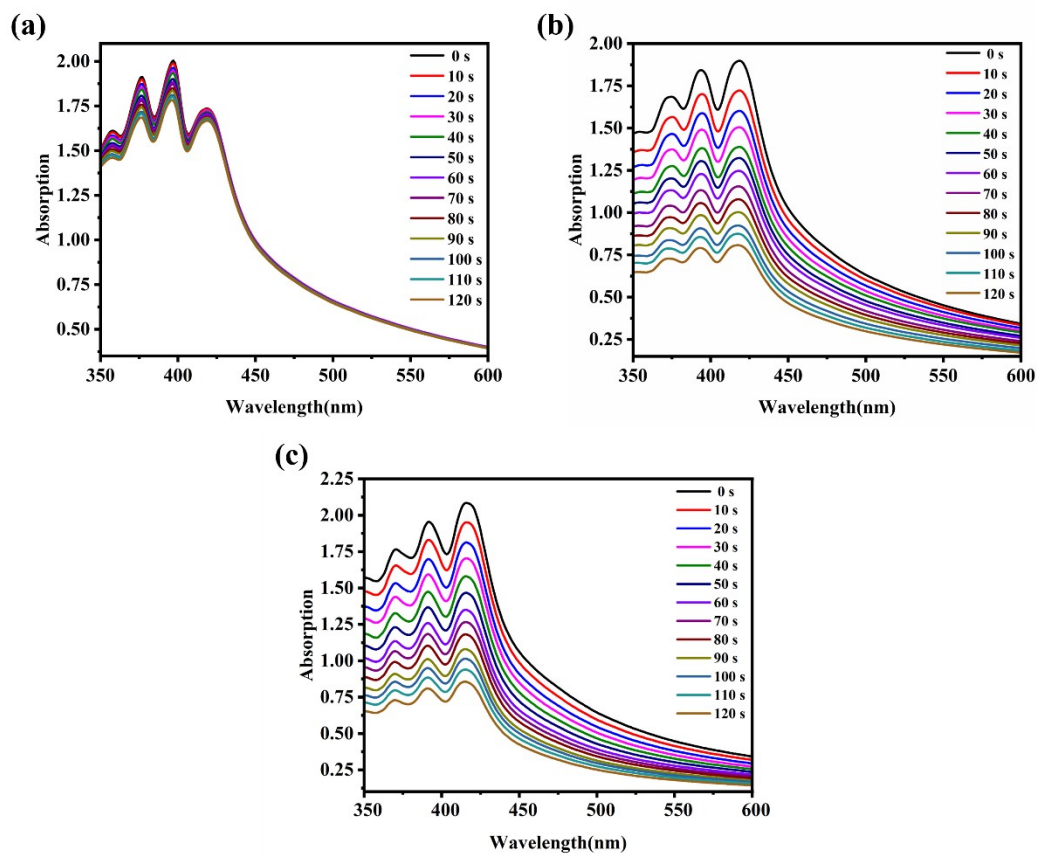

**Fig. S8** (a) UV-vis absorption spectra of ABDA in the absence of PSs under white light irradiation in aqueous solution. The absorption spectra of ABDA ( $1.6 \times 10^{-4}$  M) after irradiation (white light) for different time in the presence of (b) TPE-Epy ( $2.0 \times 10^{-5}$  M) and (c) TPE-Epy-CB[8] ( $2.0 \times 10^{-5}$  M). [TPE-Epy] =  $2.0 \times 10^{-5}$  M, [CB[8]] =  $1.5 \times 10^{-3}$  M.

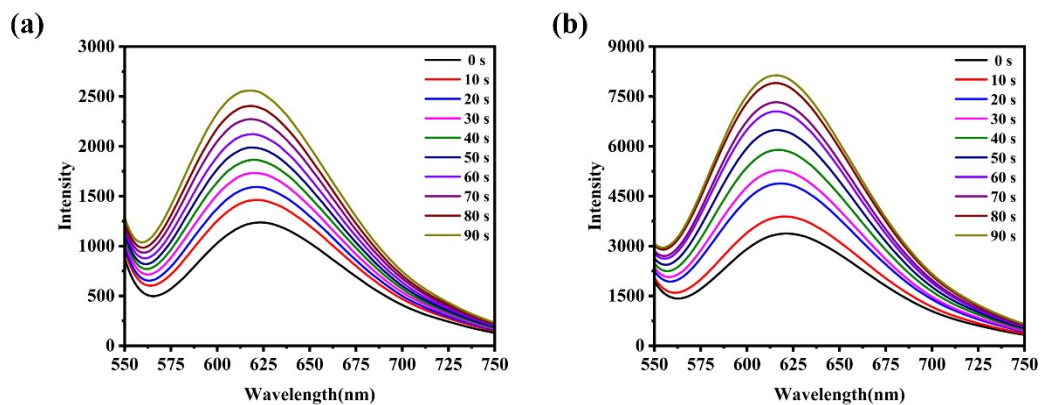

**Fig. S9** Fluorescence emission spectra of DHE ( $1.6 \times 10^{-4}$  M) after irradiation (white light) for different time in the presence of (a) TPE-Epy ( $2.0 \times 10^{-5}$  M) and (v) TPE-Epy-CB[8] ( $2.0 \times 10^{-5}$  M). [TPE-Epy] =  $2.0 \times 10^{-5}$  M, [CB[8]] =  $1.5 \times 10^{-3}$  M.

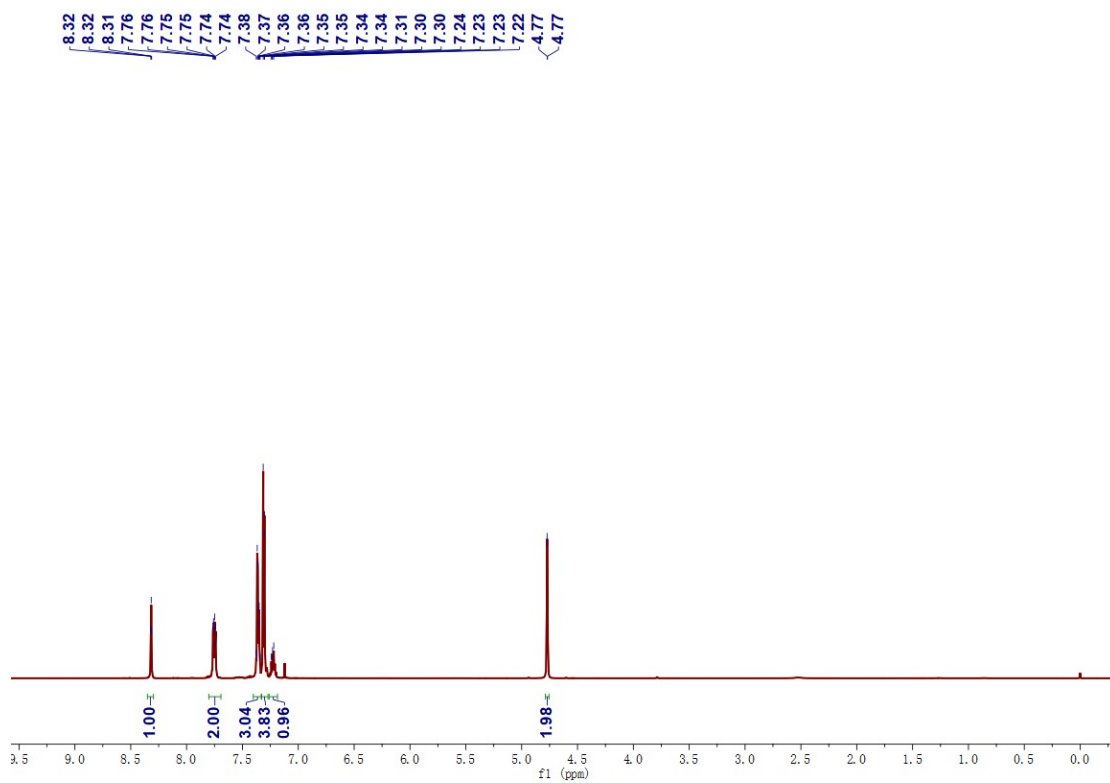

**Fig. S10**  $^1\text{H}$  NMR spectra of **2a** in  $\text{CDCl}_3$ .

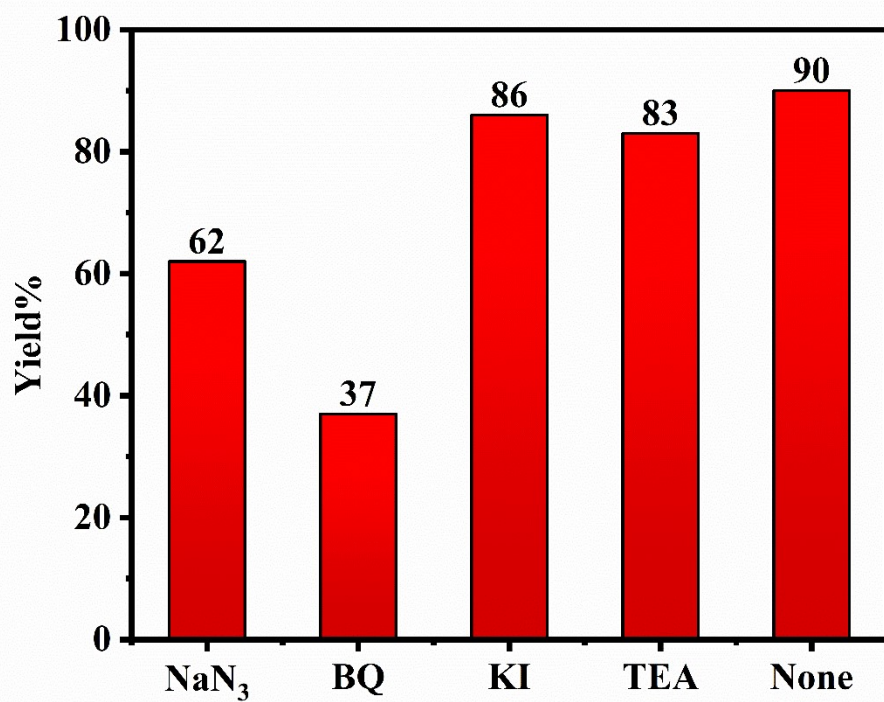

**Fig. S11** Control experiments of the photooxidation reactions in the presence of different scavengers of NaN<sub>3</sub>, BQ, KI, and TEA.



## <sup>1</sup>H NMR data of 2a-2l

### 2a. benzyl-1-phenylmethanimine

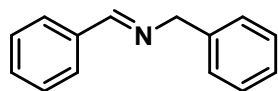

90% yield; <sup>1</sup>H NMR (400 MHz, CDCl<sub>3</sub>) δ 8.32 (d, *J* = 1.5 Hz, 1H), 7.80 – 7.69 (m, 2H), 7.40 – 7.33 (m, 3H), 7.33 – 7.27 (m, 4H), 7.26 – 7.19 (m, 1H), 4.77 (d, *J* = 1.5 Hz, 2H).

### 2b. 4-methylbenzyl-1-(p-tolyl)methanimine

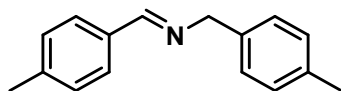

80% yield; <sup>1</sup>H NMR (400 MHz, CDCl<sub>3</sub>) δ 8.43 (s, 1H), 7.65 (d, *J* = 8.0 Hz, 2H), 7.26 (d, *J* = 7.9 Hz, 2H), 7.15 (s, 2H), 7.09 (s, 2H), 4.69 (s, 2H), 2.34 (s, 3H), 2.28 (s, 3H).

### 2c. 4-fluorobenzyl-1-(4-fluorophenyl)methanimine

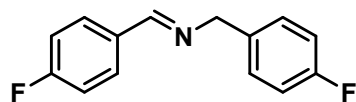

84% yield; <sup>1</sup>H NMR (400 MHz, CDCl<sub>3</sub>) δ 8.36 (s, 1H), 7.67 (d, *J* = 19.0 Hz, 2H), 7.46 – 7.40 (m, 2H), 7.10 – 7.06 (m, 4H), 4.78 (s, 2H).

### 2d. 4-chlorobenzyl-1-(4-chlorophenyl)methanimine

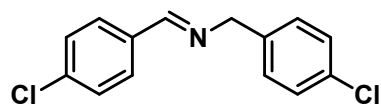

58% yield; <sup>1</sup>H NMR (400 MHz, CDCl<sub>3</sub>) δ 8.34 (s, 1H), 7.71 (d, *J* = 8.5 Hz, 2H), 7.42 – 7.37 (m, 2H), 7.30 (d, *J* = 5.7 Hz, 4H), 4.77 (s, 2H).

### 2e. 4-methoxybenzyl-1-(4-methoxyphenyl)methanimine

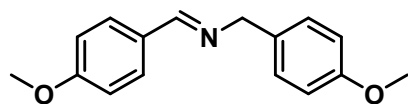

86% yield;  $^1\text{H NMR}$  (400 MHz,  $\text{CDCl}_3$ )  $\delta$  8.30 (s, 1H), 7.71 (d,  $J = 8.8$  Hz, 2H), 6.92 (d,  $J = 8.8$  Hz, 2H), 6.88 (d,  $J = 8.6$  Hz, 4H), 4.73 (s, 2H), 3.84 (s, 3H), 3.80 (s, 3H).

**2f.** 4-(((4-cyanobenzyl)imino)methyl)benzonitrile

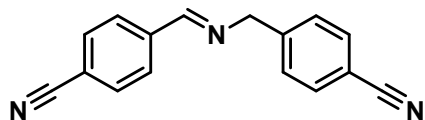

79% yield;  $^1\text{H NMR}$  (400 MHz,  $\text{CDCl}_3$ )  $\delta$  8.32 (s, 1H), 7.72 – 7.69 (m, 2H), 7.35 (d,  $J = 2.0$  Hz, 4H), 7.27 (d,  $J = 1.0$  Hz, 2H), 4.75 (s, 2H).

**2g.** 2-methylbenzyl-1-(o-tolyl)methanimine

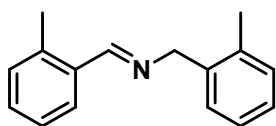

69% yield;  $^1\text{H NMR}$  (400 MHz,  $\text{CDCl}_3$ )  $\delta$  8.67 (s, 1H), 7.92 (dd,  $J = 7.6, 1.5$  Hz, 1H), 7.19 (d,  $J = 2.8$  Hz, 7H), 4.80 (m, 2H), 2.51 (s, 3H), 2.39 (s, 3H).

**2h.** 2-methoxybenzyl-1-(2-methoxyphenyl)methanimine

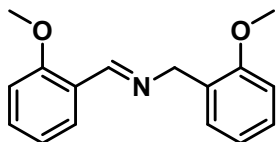

63% yield;  $^1\text{H NMR}$  (400 MHz,  $\text{CDCl}_3$ )  $\delta$  8.54 (s, 1H), 7.82 (m, 2H), 7.74 – 7.61 (m, 2H), 7.16 (m, 2H), 6.85 (m, 2H), 4.80 (m, 2H), 3.82 (s, 3H), 3.72 (s, 3H).

**2i.** 2-chlorobenzyl-1-(2-chlorophenyl)methanimine

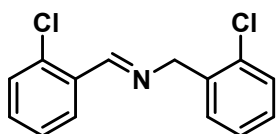

87% yield;  $^1\text{H NMR}$  (400 MHz,  $\text{CDCl}_3$ )  $\delta$  8.94 (s, 1H), 7.75 (m, 2H), 7.60 (m, 2H), 7.10 – 7.18 (m, 4H), 4.80 (m, 2H).

**2j.** 2-fluorobenzyl-1-(2-fluorophenyl)methanimine

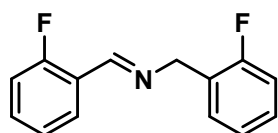

81% yield;  $^1\text{H NMR}$  (400 MHz,  $\text{CDCl}_3$ )  $\delta$  8.73 (s, 1H), 8.05 – 8.01 (m, 1H), 7.43 – 7.35 (m, 4H), 7.21 – 7.13 (m, 3H), 4.88 (s, 2H).

**2k.** 3-methylbenzyl-1-(*m*-tolyl)methanimine

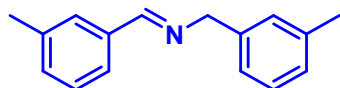

90% yield;  $^1\text{H NMR}$  (400 MHz,  $\text{CDCl}_3$ )  $\delta$  8.36 (s, 1H), 7.90 – 7.44 (m, 4H), 7.14 (d,  $J$  = 5.5 Hz, 4H), 4.78 (s, 2H), 2.40 (m, 3H), 2.34 (s, 3H).

**2l.** 3-methoxybenzyl-1-(3-methoxyphenyl)methanimine

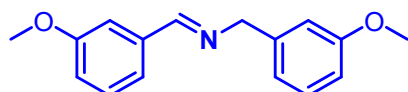

63% yield;  $^1\text{H NMR}$  (400 MHz,  $\text{CDCl}_3$ )  $\delta$  8.37 (m, 1H), 7.41 – 7.35 (m, 2H), 7.30 (s, 2H), 7.23 (s, 2H), 7.00 – 6.96 (m, 2H), 4.80 (s, 2H), 3.76 (s, 3H), 3.70 (s, 3H).
